# Supplementary material
Source: PubMed Central journal article supplement (PMC3705962)
Supplement: NIHMS473686-supplement-Baker_SI_pdf.pdf [file NIHMS473686-supplement-Baker_SI_pdf.pdf]

## Contents

|                                                                                                                                    |    |
|------------------------------------------------------------------------------------------------------------------------------------|----|
| Supplementary Discussion 1   Emergent rules.....                                                                                   | 3  |
| Supplementary Figure 1   Emergent rules. ....                                                                                      | 5  |
| Supplementary Figure 2   Torsion energies of loops are correlated with the chirality of $\beta$ -hairpins in natural proteins..... | 7  |
| Supplementary Figure 3   The $\beta\alpha$ -rule derives in part from the bendability of the backbone. ....                        | 8  |
| Supplementary Figure 4   The $\alpha\beta$ -rule for loop lengths 3 and 4 derives in part from hydrogen-bonded helix capping. .... | 9  |
| Supplementary Figure 5   Dependence of $\beta\beta\alpha$ -unit chirality on secondary structure lengths in native structures..... | 10 |
| Supplementary Figure 6   Explanation for $\beta\beta\alpha$ -unit emergent rule.....                                               | 11 |
| Supplementary Figure 7   Dependence of $\alpha\beta\beta$ -unit chirality on secondary structure lengths in native structures..... | 12 |
| Supplementary Figure 8   Explanation for $\alpha\beta\beta$ -unit emergent rule.....                                               | 13 |
| Supplementary Figure 9   Emergent rule for $\beta\alpha\beta$ -unit (1). ....                                                      | 14 |
| Supplementary Figure 10   Emergent rule for $\beta\alpha\beta$ -unit (2).....                                                      | 15 |
| Supplementary Discussion 2   Reasons for choosing the five specific folds. ....                                                    | 16 |
| Supplementary Figure 11   Examples of non-funneled energy landscapes. ....                                                         | 17 |

|                                                                                                                                                           |           |
|-----------------------------------------------------------------------------------------------------------------------------------------------------------|-----------|
| <b>Supplementary Figure 12   Computational protocol for designing ideal protein structures with funneled energy landscapes. ....</b>                      | <b>18</b> |
| <b>Supplementary Figure 13   Oligomerization state of design for each of the five folds by SEC-MALS. ....</b>                                             | <b>19</b> |
| <b>Supplementary Figure 14   Superpositions of computational models and NMR structures.....</b>                                                           | <b>20</b> |
| <b>Supplementary Table 1   Summary of experimental results of 11 designs for Fold-I.....</b>                                                              | <b>21</b> |
| <b>Supplementary Table 2   Summary of experimental results of 12 designs for Fold-II. ....</b>                                                            | <b>22</b> |
| <b>Supplementary Table 3   Summary of experimental results of 14 designs for Fold-III.....</b>                                                            | <b>23</b> |
| <b>Supplementary Table 4   Summary of experimental results of 5 designs for Fold-IV. ....</b>                                                             | <b>24</b> |
| <b>Supplementary Table 5   Summary of experimental results of 12 designs for Fold-V. ....</b>                                                             | <b>25</b> |
| <b>Supplementary Table 6   Experimental data of design for each of the five folds.....</b>                                                                | <b>26</b> |
| <b>Supplementary Table 7   NMR and refinement statistics for protein structures*. ....</b>                                                                | <b>27</b> |
| <b>Supplementary Method 1   Simulations for two secondary structure elements. ....</b>                                                                    | <b>29</b> |
| <b>Supplementary Method 2   Simulations for three secondary structure elements. ....</b>                                                                  | <b>31</b> |
| <b>Supplementary Method 3   Analysis of natural protein features. ....</b>                                                                                | <b>32</b> |
| <b>Supplementary Method 4   Definition of the chirality of a <math>\beta\beta</math>-unit in fundamental rules.....</b>                                   | <b>33</b> |
| <b>Supplementary Method 5   Definition of the orientation of <math>\beta\alpha</math>- and <math>\alpha\beta</math>- units in fundamental rules. ....</b> | <b>33</b> |
| <b>Supplementary Table 8   Designed sequences .....</b>                                                                                                   | <b>34</b> |
| <b>References .....</b>                                                                                                                                   | <b>39</b> |

## Supplementary Discussion 1 | Emergent rules.

The rules are expressed as relations between the chirality of the unit and the secondary structure lengths.

The chirality of the unit consisting of three secondary structure elements is defined as right handed (R) if the cross product of the vector along the axis of the first element with the vector from the center of the first element to the center of the second element points toward the third element, and left handed (L) otherwise (Supplementary Fig. 1d).

For  $\beta\beta\alpha$ -units, both R- and L- topologies are observed in nature. Thus, negative design to destabilize one of the topologies is important. Secondary structure constrained folding simulations (see Supplementary Method 2) showed that the choice between R- or L- topologies depends on the strand and loop lengths, in particular, on  $l_1$  and the sum  $s+l_2$  (Supplementary Fig. 1a). A similar trend is also observed in native protein structures (Supplementary Fig. 5). This rule emerges from the combination of the  $\beta\beta$ - and  $\beta\alpha$ -rules. The  $\beta\beta$ -rule relates the loop length  $l_1$  to the pleating of the  $\beta$ -hairpin, and therefore the pleat direction at the end of the second strand depends on the strand length (assuming there are no beta bulges). Given the pleat direction, the helix direction is then determined by the loop length  $l_2$  by the  $\beta\alpha$ -rule (see Supplementary Fig. 6 for details).

For  $\alpha\beta\beta$ -units, both R- and L- topologies are observed in nature. Thus, negative design to destabilize one of the topologies is again important. Secondary structure constrained folding simulations revealed that the choice depends on whether the strand lengths are even or odd and on the loop length (Supplementary Fig. 1b), and this trend is again observed in native protein structures (Supplementary Fig. 7). This rule emerges from the combination of the  $\alpha\beta$ - and  $\beta\beta$ -rules. As in the case of  $\beta\beta\alpha$ -units, the pleating of the  $\beta$ -hairpin is determined by the loop length by the  $\beta\beta$ -rule. The pleat of the first residue in the strand immediately following the helix then depends on whether the strand has an even or odd number of residues, and this in turn determines the helix direction as specified by the  $\alpha\beta$ -rule (see Supplementary Fig. 8 for details).

$\beta\alpha\beta$ -units are almost always right handed in protein structures<sup>S1</sup> and hence it is only necessary to focus on positive design for this motif. We performed secondary structure constrained folding simulations varying the strand, helix and loop lengths and measured the frequency of formation of a  $\beta\alpha\beta$ -motif in which the two strands make a parallel strand pairing and the helix packs on the both strands. We found that the frequency of formation of the motif depends on the loop lengths according to the  $\beta\alpha$ - and  $\alpha\beta$ - rules (Supplementary Fig. 1c and 9), and also that the strand and helix lengths are codependent (Supplementary Fig. 10).

Supplementary Figure 1 | Emergent rules.

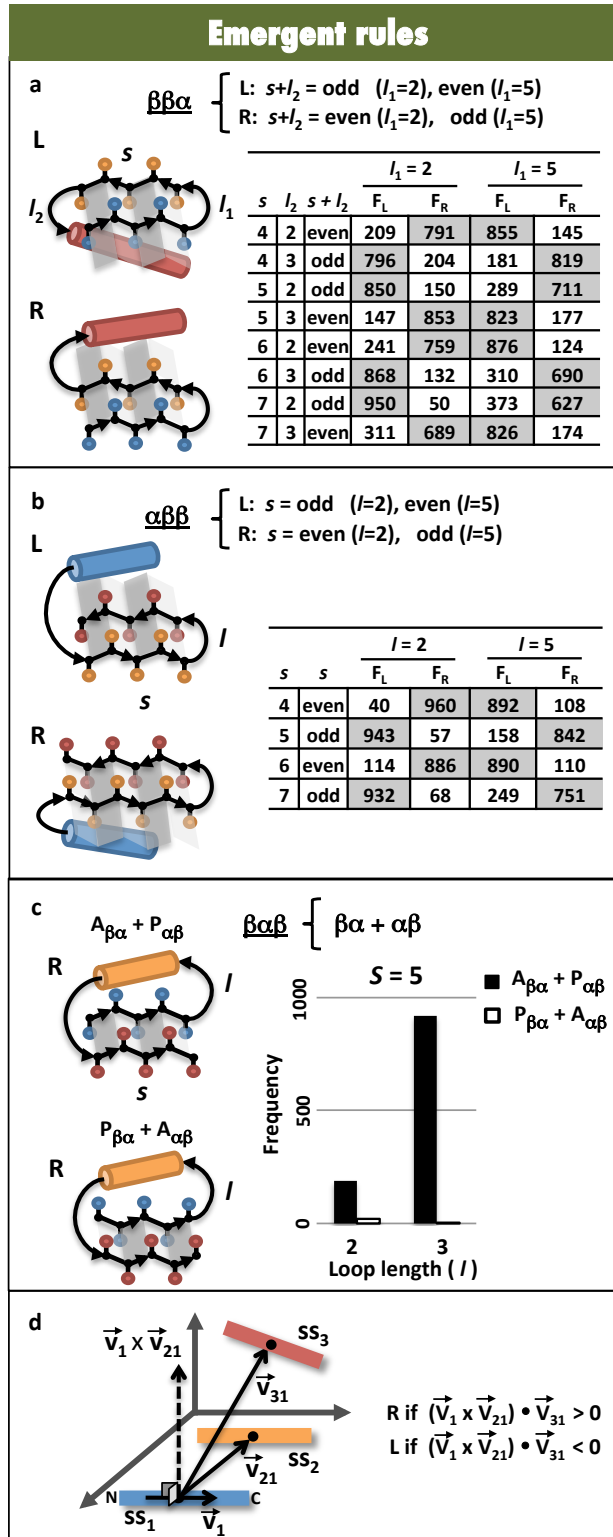

## Supplementary Figure 1 | Emergent rules.

All data were obtained from Rosetta folding simulations. **a**,  $\beta\beta\alpha$ -rule. L- and R- topologies of  $\beta\beta\alpha$ -units are illustrated. The relationship between secondary structure lengths and the L- and R- topologies is given by the formula. The observed frequencies of L- and R- topologies in folding simulations for different secondary structure lengths are shown in the table;  $F_L$  ( $F_R$ ) are the frequencies of the L- (R-) topology; shaded table elements satisfy the rule. Consistent with the rule, the illustrated L-topology has secondary structure lengths  $s=5$ ,  $l_1=2$ , and  $l_2=2$ , while the illustrated R-topology has  $s=5$ ,  $l_1=2$ , and  $l_2=3$  ( $s$ : strand,  $l_1, l_2$ : loops). **b**,  $\alpha\beta\beta$ -rule. As in **a**, the illustrated topologies have secondary structure lengths consistent with the formula:  $s=5$  and  $l=2$  for L, and  $s=6$  and  $l=2$  for R. The loop length immediately following the helix was fixed to 2 for all the simulations. **c**,  $\beta\alpha\beta$ -rule. Only the R-topology is consistent with the chirality of the polypeptide chain. The optimal secondary structure lengths for folding to the  $\beta\alpha\beta$ -topology follow from the  $\beta\alpha$ - and  $\alpha\beta$ - rules. The two pleatings of the  $\beta\alpha\beta$ -topology for strand lengths 5 are illustrated:  $A\beta\alpha + P\alpha\beta$  and  $P\beta\alpha + A\alpha\beta$ . The observed frequency for each pleating in the folding simulations ( $l=2,3$ , helix length 14, and the loop length 2 following the helix) is shown in the histogram. The  $P\beta\alpha + A\alpha\beta$  pleating that violates the  $\alpha\beta$ -rule was rarely observed, and the  $A\beta\alpha + P\alpha\beta$  was much observed when  $l=3$ , which is consistent with the  $\beta\alpha$ -rule. **d**, Chirality of three consecutive secondary structure elements.  $SS_1, SS_2$  and  $SS_3$  represent three secondary structure elements.  $\vec{V}_1$  is a vector along the axis of the first element,  $\vec{V}_{21}$  is a vector from the center of the first element to the center of the second element, and  $\vec{V}_{31}$  is a vector from the center of the first element to the center of the third element. The chirality of the unit consisting of the three secondary structure elements is right handed (R), if  $(\vec{V}_1 \times \vec{V}_{21}) \cdot \vec{V}_{31} > 0$ , and left handed (L), if  $(\vec{V}_1 \times \vec{V}_{21}) \cdot \vec{V}_{31} < 0$ .

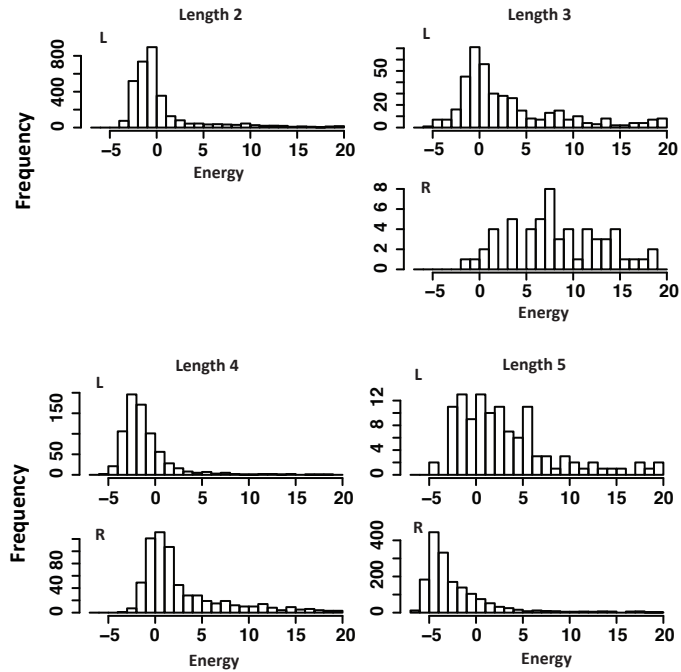

**Supplementary Figure 2 | Torsion energies of loops are correlated with the chirality of  $\beta$ -hairpins in natural proteins.**

The torsion energies for L- and R- hairpins were calculated for each loop length using Rosetta with the rama score term<sup>S2</sup> 1.0. There are no R-hairpins at the loop length 2. For 2 and 3 residue loops, L-hairpins have lower energy, and for 5 residue loop, R-hairpins have lower energy.

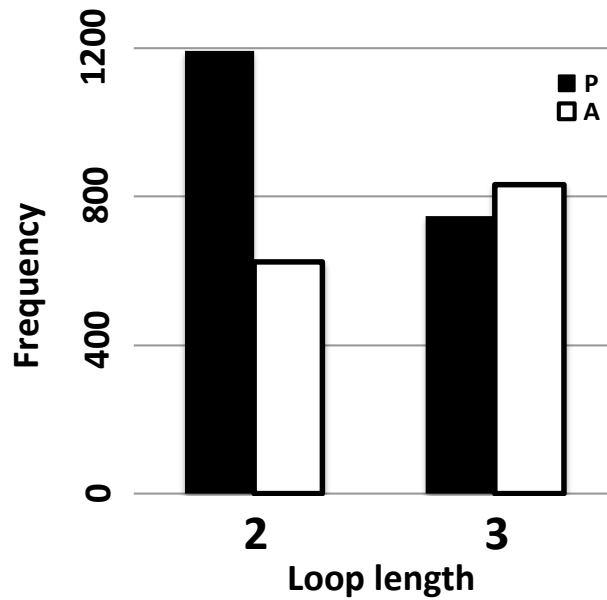

**Supplementary Figure 3 | The  $\beta\alpha$ -rule derives in part from the bendability of the backbone.**

The right histogram of Fig. 1b shows the native structure distribution for the orientation of  $\beta\alpha$ -units for which the angle between the helix and strand is  $\leq 60^\circ$ . The above histogram shows the native structure distribution without angle filtering. Since the loop length dependence is much stronger in Fig. 1b than in the histogram above, we infer that the rule arises in part from restriction imposed by chain bendability.



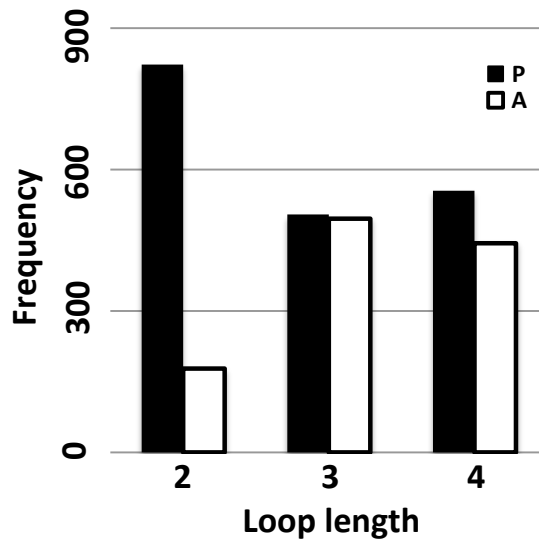

**Supplementary Figure 4 | The  $\alpha\beta$ -rule for loop lengths 3 and 4 derives in part from hydrogen-bonded helix capping.**

The left histogram of Fig. 1c shows the simulation structure distribution for the orientation of  $\alpha\beta$ -units for which the loop provides a hydrogen-bonded helix capping and does not extend the  $\beta$ -strand (see Supplementary Method 1). The above histogram shows the simulation structure distribution for all  $\alpha\beta$ -units. Since the trend that the preferred orientation of  $\alpha\beta$ -units is P is much stronger in Fig. 1c than in the histogram above for loop lengths 3 and 4, we infer that the rule for the loop lengths 3 and 4 arises in part from a hydrogen-bonded helix capping.

| $\beta\beta\alpha$ | $l_1 = 2$ |       | $l_1 = 5$ |       |
|--------------------|-----------|-------|-----------|-------|
|                    | $F_L$     | $F_R$ | $F_L$     | $F_R$ |
| $s + l_2$          |           |       |           |       |
| even               | 2         | 20    | 22        | 8     |
| odd                | 18        | 1     | 5 *       | 5 *   |

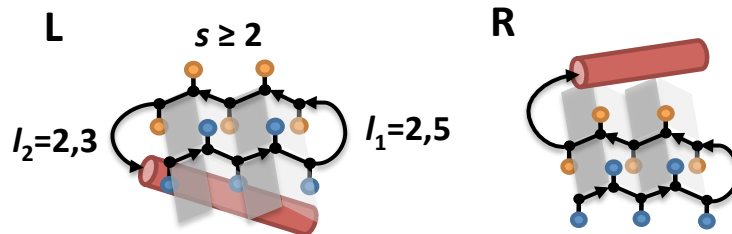

**Supplementary Figure 5 | Dependence of  $\beta\beta\alpha$ -unit chirality on secondary structure lengths in native structures.**

$s$  represents the strand lengths,  $l_1$  is the loop length between the strands, and  $l_2$  is the loop length between the second strand and the helix. The table shows the frequencies of L- and R- topologies ( $F_L$  and  $F_R$ ) in nature depending on the sum  $s+l_2$  and  $l_1$ ; shaded table elements satisfy the rule. We found that the native structures of  $\beta\beta\alpha$ -units also follow the  $\beta\beta\alpha$ -rule that we presented in Supplementary Fig. 1a for the simulations, except for  $l_1=5$  and  $s+l_2=\text{odd}$  (indicated by asterisks).

$$\beta\beta\alpha \begin{cases} \text{L: } s+l_2 = \text{odd} \quad (l_1=2), \text{ even} \quad (l_1=5) \\ \text{R: } s+l_2 = \text{even} \quad (l_1=2), \text{ odd} \quad (l_1=5) \end{cases}$$

|          |                                                                                                                                             |                                                                                                                                             |
|----------|---------------------------------------------------------------------------------------------------------------------------------------------|---------------------------------------------------------------------------------------------------------------------------------------------|
| <b>L</b> | $s+l_2 = 5+2 = \text{odd}$<br>$s=5$<br>$l_2=2$ 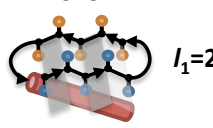 $l_1=2$    | $s+l_2 = 5+3 = \text{even}$<br>$s=5$<br>$l_2=3$  $l_1=5$  |
|          | $s+l_2 = 6+3 = \text{odd}$<br>$s=6$<br>$l_2=3$  $l_1=2$    | $s+l_2 = 6+2 = \text{even}$<br>$s=6$<br>$l_2=2$  $l_1=5$  |
| <b>R</b> | $s+l_2 = 5+3 = \text{even}$<br>$l_2=3$  $l_1=2$<br>$s=5$   | $s+l_2 = 5+2 = \text{odd}$<br>$l_2=2$  $l_1=5$<br>$s=5$   |
|          | $s+l_2 = 6+2 = \text{even}$<br>$l_2=2$  $l_1=2$<br>$s=6$ | $s+l_2 = 6+3 = \text{odd}$<br>$l_2=3$  $l_1=5$<br>$s=6$ |

### Supplementary Figure 6 | Explanation for $\beta\beta\alpha$ -unit emergent rule.

The dependence of the chirality of  $\beta\beta\alpha$ -units on the secondary structure lengths is illustrated when the strand lengths  $s$  are 5 and 6. When the loop length  $l_1$  is 2 (left boxes), the pleat of the strand residue preceding or following the loop points downward by the  $\beta\beta$ -rule. The pleat direction at the end of the second strand is determined by the strand lengths: downward ( $s=5$ ) and upward ( $s=6$ ). The helix direction is then determined by the  $\beta\alpha$ -rule: P if the loop length  $l_2$  is 2, and A if  $l_2$  is 3. Hence the chirality of the  $\beta\beta\alpha$ -unit is L when  $s+l_2 = \text{odd}$ , and R when  $s+l_2 = \text{even}$ . When the loop length  $l_1$  is 5 (right boxes), the pleating of the  $\beta$ -hairpin is flipped. Therefore, the  $s+l_2$  dependence of the chirality of the  $\beta\beta\alpha$ -unit is also flipped.

| $\alpha\beta\beta$ | $l = 2$ |       | $l = 5$ |       |       |
|--------------------|---------|-------|---------|-------|-------|
|                    | $s$     | $F_L$ | $F_R$   | $F_L$ | $F_R$ |
| even               |         | 19    | 30      | 21    | 4     |
| odd                |         | 36    | 3       | 9     | 18    |

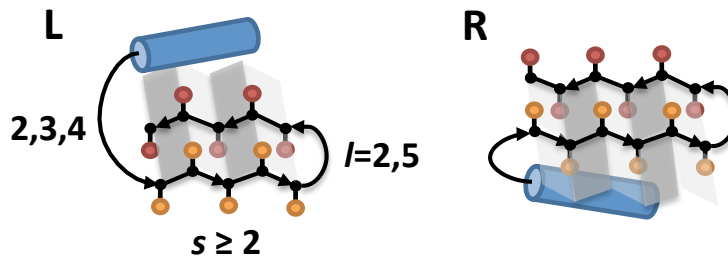

**Supplementary Figure 7 | Dependence of  $\alpha\beta\beta$ -unit chirality on secondary structure lengths in native structures.**

$s$  represents the strand lengths and  $l$  is the loop length between the strands. For the loop between the helix and the first strand, we took the structures that have the lengths, 2, 3 and 4. The table shows the frequencies of the L- and R- topologies ( $F_L$  and  $F_R$ ) in nature depending on  $s$  and  $l$ ; shaded table elements satisfy the rule. We found that the native structures of  $\alpha\beta\beta$ -units also follow the  $\alpha\beta\beta$ -rule that we presented in Supplementary Fig. 1b for the simulations.

$$\underline{\alpha\beta\beta} \begin{cases} \text{L: } s = \text{odd } (l=2), \text{ even } (l=5) \\ \text{R: } s = \text{even } (l=2), \text{ odd } (l=5) \end{cases}$$

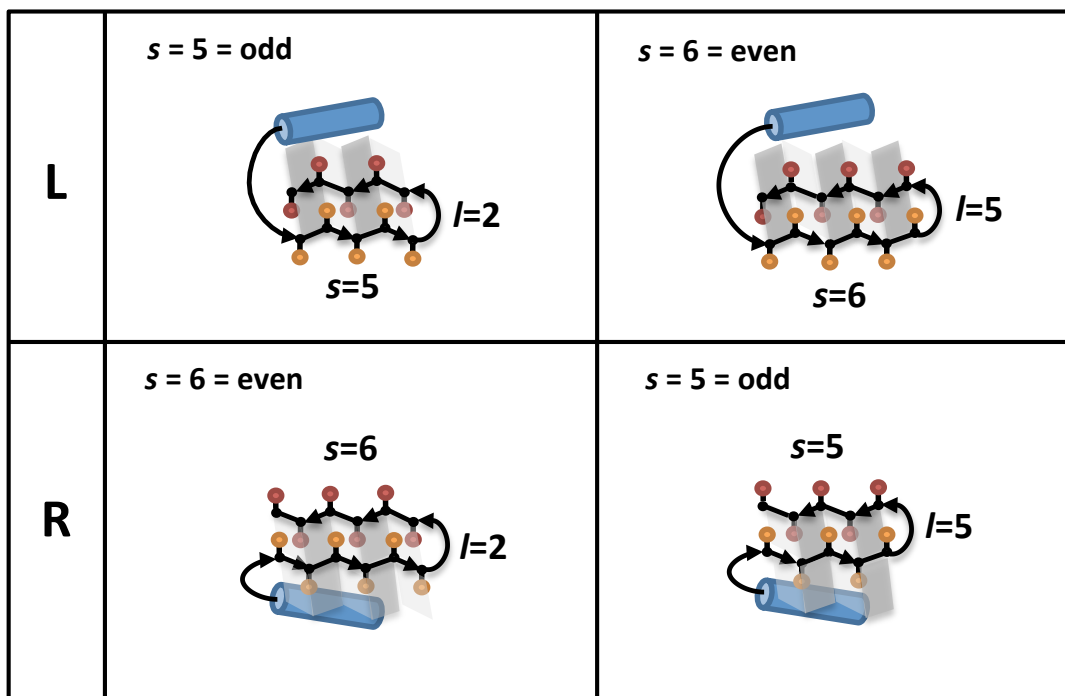

### Supplementary Figure 8 | Explanation for $\alpha\beta\beta$ -unit emergent rule.

The dependence of the chirality of  $\alpha\beta\beta$ -units on the secondary structure lengths is illustrated when the strand lengths  $s$  are 5 and 6. When the loop length  $l$  is 2 (left boxes), the pleat of the strand residue preceding or following the loop points downward by the  $\beta\beta$ -rule. The pleat direction at the beginning of the first strand is determined by the strand lengths: downward ( $s=5$ ) and upward ( $s=6$ ). The helix direction is almost always P by the  $\alpha\beta$ -rule. Hence the chirality of the  $\alpha\beta\beta$ -unit is L when  $s = \text{odd}$ , and R when  $s = \text{even}$ . When the loop length  $l$  is 5 (right boxes), the pleating of the  $\beta$ -hairpin is flipped. Therefore, the dependence of the chirality of the  $\alpha\beta\beta$ -unit on the strand lengths  $s$  is also flipped.

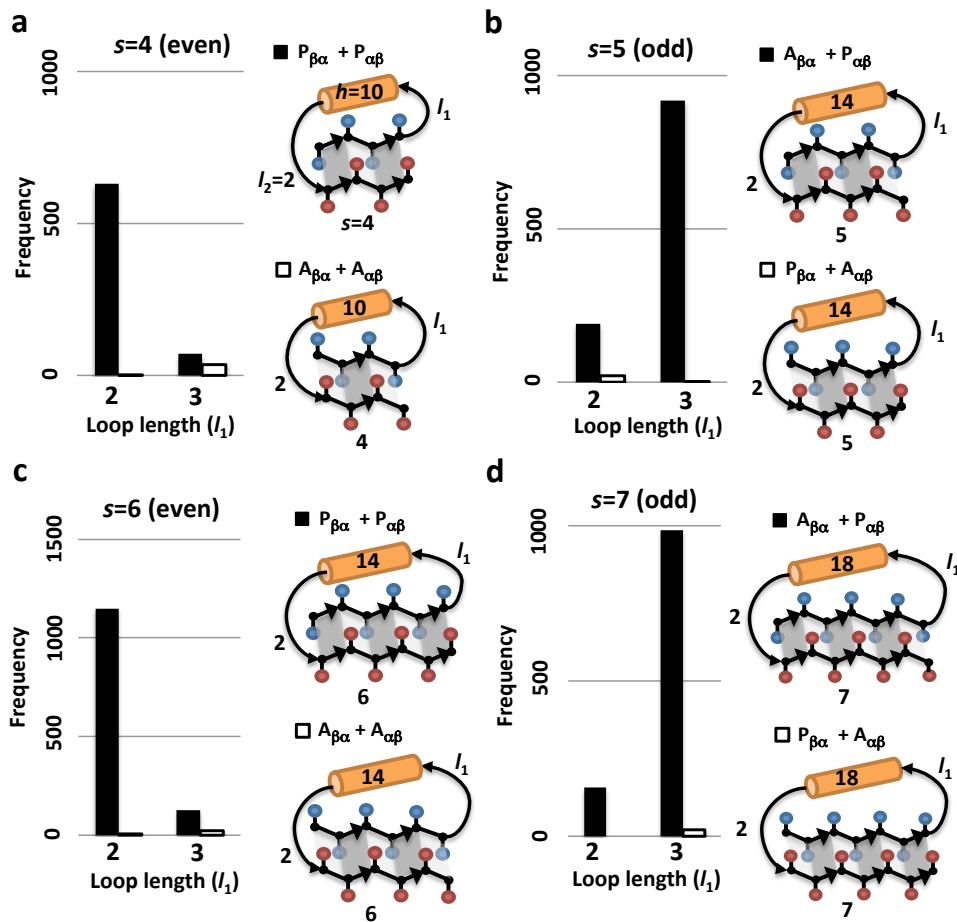

### Supplementary Figure 9 | Emergent rule for $\beta\alpha\beta$ -unit (1).

Folding simulations of  $\beta\alpha\beta$ -units were carried out for different secondary structure lengths: loop lengths  $l_1=2,3$  and  $l_2=2$ , and strand and helix lengths **a**)  $s=4$ ,  $h=10$ , **b**)  $s=5$ ,  $h=14$ , **c**)  $s=6$ ,  $h=14$ , and **d**)  $s=7$ ,  $h=18$ . For each strand length, there are two types of pleating of  $\beta\alpha\beta$ -motifs (illustrated on the right side) in which the two strands make a parallel strand pairing and the helix packs on the both strands. These pleatings are represented using the orientations (P and A) of  $\beta\alpha$ - and  $\alpha\beta$ - units. Taking the structures that form a  $\beta\alpha\beta$ -motif at the end point, we counted the structures for each pleat type in the histograms. The simulation results show that  $\beta\alpha\beta$ -units follow directly from the  $\beta\alpha$ - and  $\alpha\beta$ - rules. For all cases of the strand lengths, the structures with the sheet pleating including  $P_{\alpha\beta}$  are highly observed (filled bars), while those with the sheet pleating including  $A_{\alpha\beta}$ , which violate the  $\alpha\beta$ -rule, are rarely observed (open bars). In addition, when the strands have an even number of residues (**a**, **c**),  $P_{\beta\alpha} + P_{\alpha\beta}$  is frequently observed when the loop  $l_1$  is 2, which follows the  $\beta\alpha$ -rule. When the strands have an odd number of residues (**b**, **d**),  $A_{\beta\alpha} + P_{\alpha\beta}$  is frequently observed when the loop  $l_1$  is 3, which follows the  $\beta\alpha$ -rule.

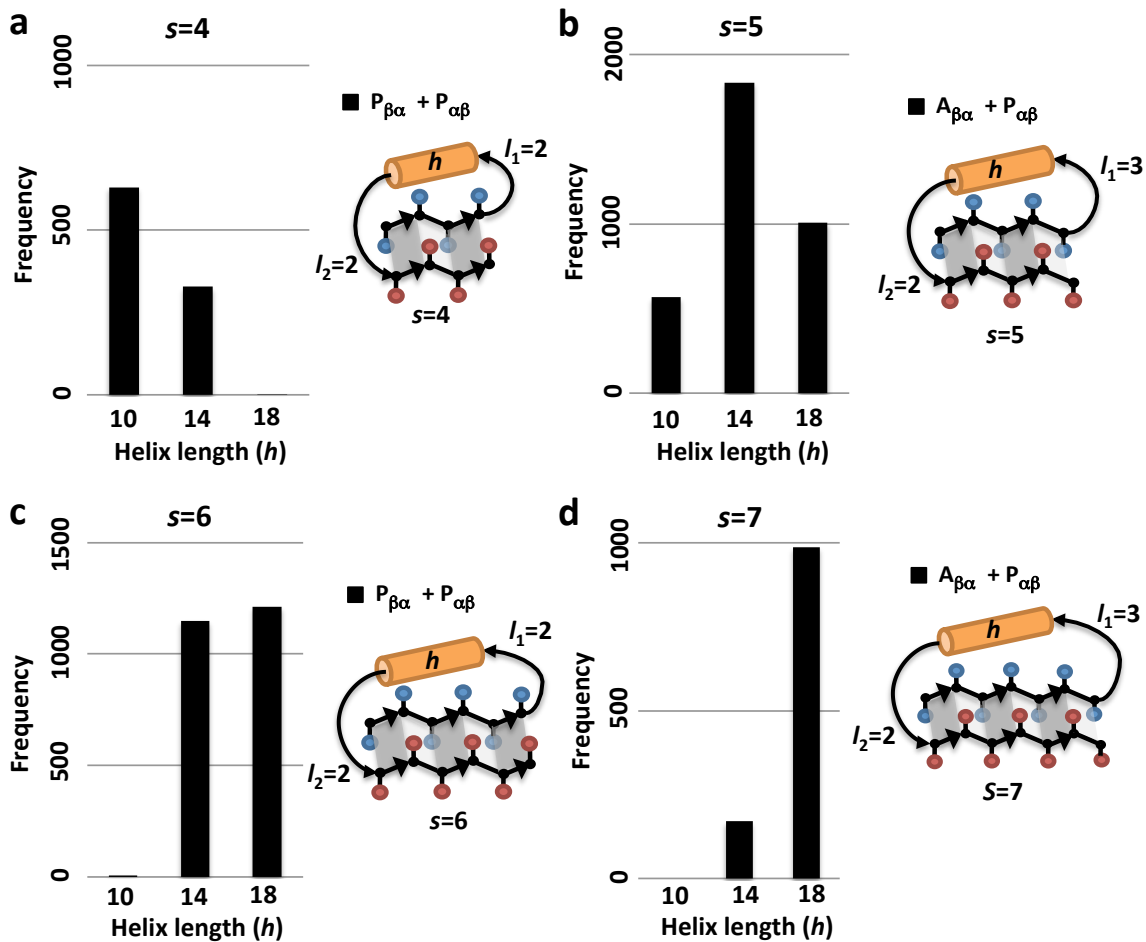

### Supplementary Figure 10 | Emergent rule for $\beta\alpha\beta$ -unit (2).

Folding simulations of  $\beta\alpha\beta$ -units were carried out for different helix lengths  $h=10, 14, 18$ . The other secondary structure lengths were fixed to be optimal (see Supplementary Fig. 9): **a**)  $l_1=2, l_2=2, s=4$ , **b**)  $l_1=3, l_2=2, s=5$ , **c**)  $l_1=2, l_2=2, s=6$ , and **d**)  $l_1=3, l_2=2, s=7$ . Taking the end point structures of the simulations, we counted the structures that form the  $\beta\alpha\beta$ -motif following the  $\beta\alpha$ - and  $\alpha\beta$ -rules. The simulation results show the codependency between the helix and strand lengths: the longer strand favors the longer helix.

## Supplementary Discussion 2 | Reasons for choosing the five specific folds.

We chose a diverse set of folds that represent the variation in alpha-beta proteins found in nature; **Fold-I**: Ferredoxin-like fold. Two helices pack against an antiparallel  $\beta$ -sheet. **Fold-II**: Rossmann2x2 fold. Two helices pack against a parallel  $\beta$ -sheet from both sides of the sheet. **Fold-III**: IF3-like fold. Two helices pack against a  $\beta$ -sheet, same as Fold-I, but the  $\beta$ -sheet has the mixture of parallel and antiparallel strand-pairings. **Fold-IV**: Ploop2x2 fold. Two helices pack against a parallel  $\beta$ -sheet from both sides of the sheet, same as Fold-II, but the order of the two center strands is switched. **Fold-V**: Rossmann3x1 fold. Three and one helices pack against a parallel  $\beta$ -sheet from both sides of the sheet.

Folds-I and III are  $\alpha+\beta$  proteins and helices are packed against a sheet from one side of the sheet. On the other hand, Folds-II, IV, and V are  $\alpha/\beta$  proteins and helices are packed against a sheet from both sides of the sheet. Fold-I, and Fold-II and V are superfolds that are frequently observed in nature. Folds-III and IV are less frequently but still occasionally observed in nature. Fold-III is different from the other folds in that the sheet has the mixture of parallel and antiparallel strand-pairings. Fold-IV is a challenging target to design since it differs from Fold-II only in the internal strand swap.



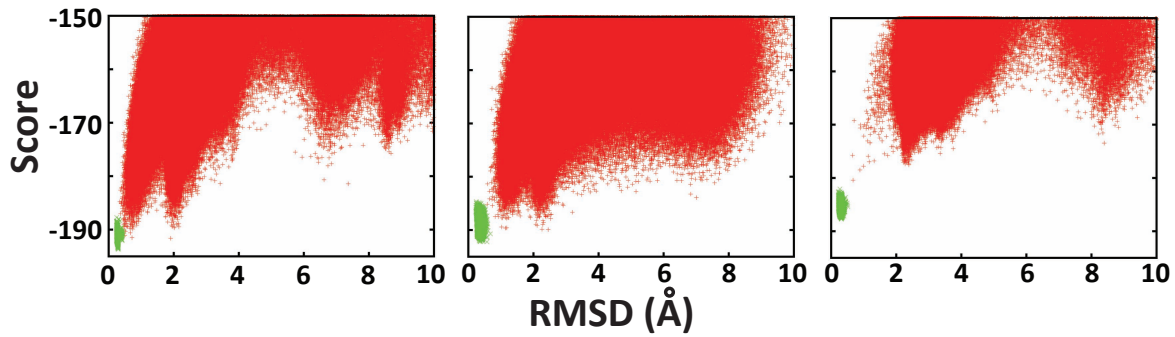

**Supplementary Figure 11 | Examples of non-funneled energy landscapes.**

Non-funneled energy landscapes of designed sequences for Fold-III obtained from Rosetta ab initio structure prediction simulations. Red points represent the lowest energy structures obtained in independent Monte Carlo structure prediction trajectories on Rosetta@home starting from an extended chain; the y-axis is the Rosetta all atom energy, the x-axis, the root mean square deviation (RMSD) to the design model. Green points represent the lowest energy structures obtained in trajectories starting from the design model. The energy distributions of green points are similar to or lower than that of the best design for Fold-III, Di-III\_14 (Fig. 3 row(3) column(a)).

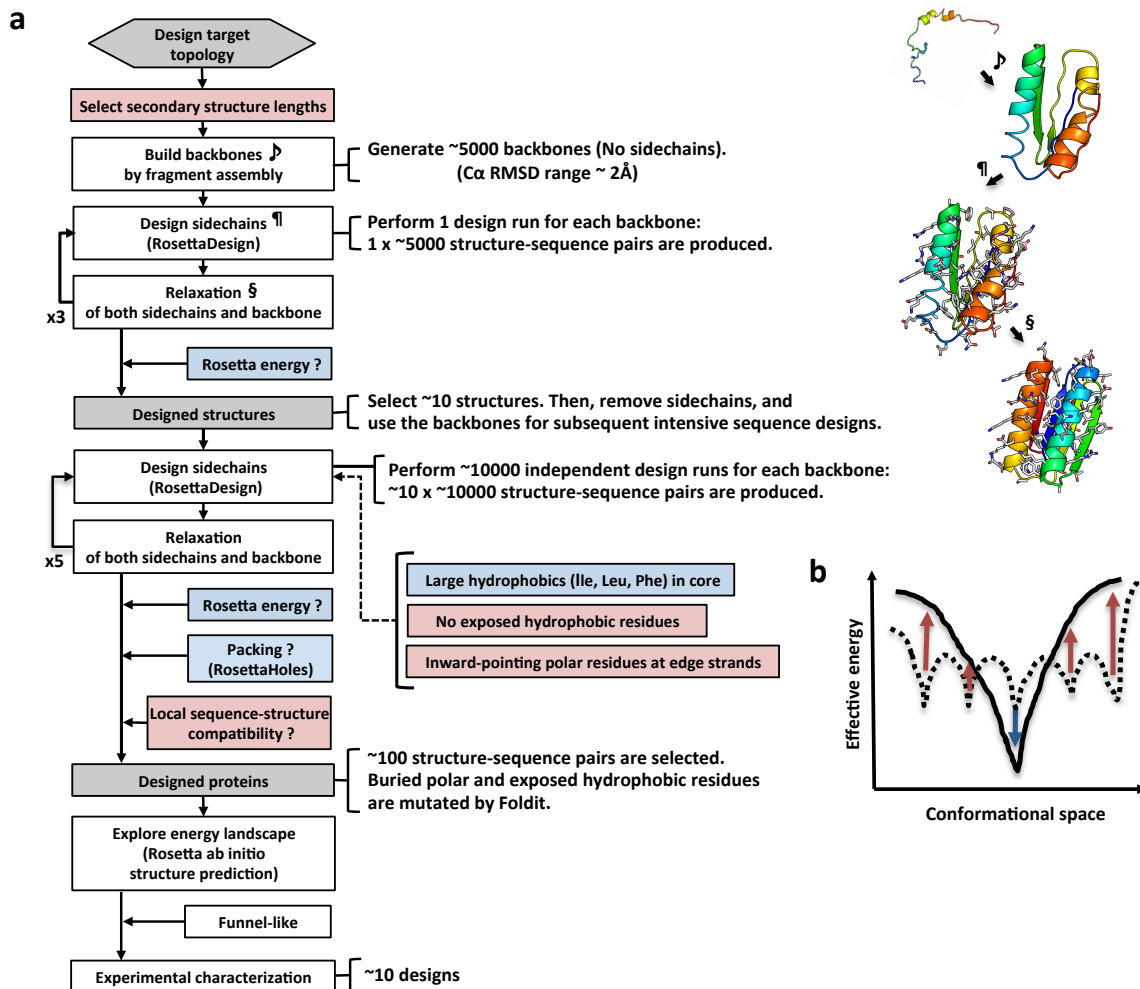

## Supplementary Figure 12 | Computational protocol for designing ideal protein structures with funneled energy landscapes.

**a**, Flowchart of the design protocol. The red boxes indicate negative design steps, and the blue boxes represent positive design steps. An example of design process of Fold-I is illustrated in the right figures; each symbol in the figures corresponds to the design process with the same symbol in the flowchart. See the references: RosettaDesign<sup>S3</sup>, Relaxation of both sidechains and backbone<sup>S4</sup>, RosettaHoles<sup>S5</sup>, Foldit<sup>S6</sup>, and Rosetta abinitio structure prediction<sup>S2</sup>. **b**, Illustration of a non-funneled energy landscape (dotted line), and a funneled energy landscape (solid line). The blue arrow represents positive design, and the red arrows indicate negative design. \*\* The command lines and the examples of input files are available from the Rosetta SVN code repository in the directory:

[https://svn.rosettacommons.org/source/trunk/rosetta/rosetta\\_demos/public/ideal\\_proteins/](https://svn.rosettacommons.org/source/trunk/rosetta/rosetta_demos/public/ideal_proteins/).

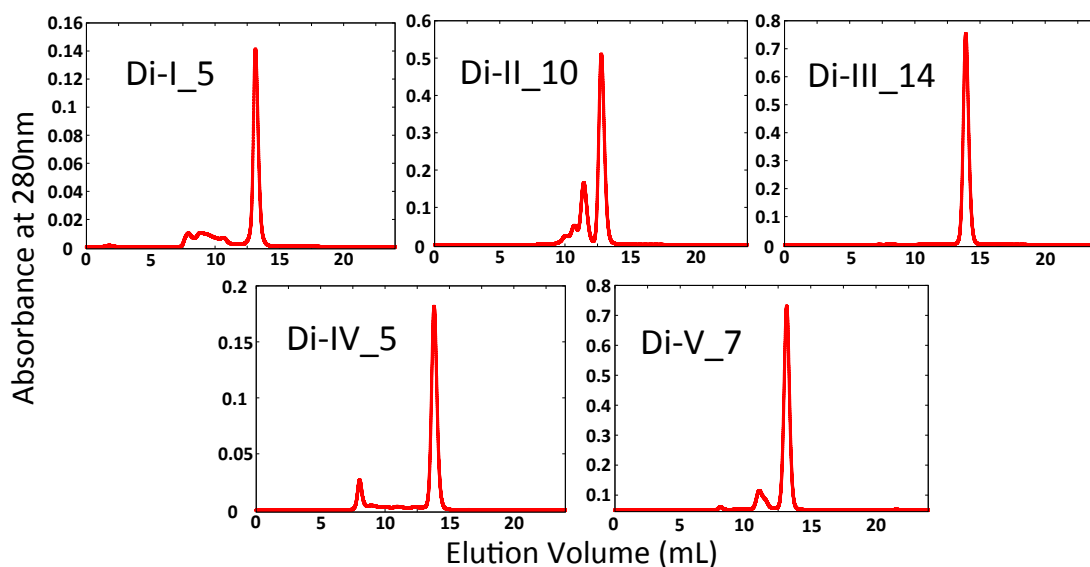

|           | theoretical MW (kDa) | predicted MW (kDa) |
|-----------|----------------------|--------------------|
|           |                      | (% of main peak)   |
| Di-I_5    | 10.2                 | 12.9 (74)          |
| Di-II_10  | 13.1                 | 13.8 (67)          |
| Di-III_14 | 9.8                  | 9.5 (100)          |
| Di-IV_5   | 12.7                 | 12.9 (90)          |
| Di-V_7    | 13.1                 | 12.5 (88)          |

**Supplementary Figure 13 | Oligomerization state of design for each of the five folds by SEC-MALS.**

The volume 100  $\mu$ l of 400-700  $\mu$ M protein samples was injected into a Superdex 75 10/300 GL column equilibrated with PBS buffer (pH 7.4). The absorbance at 280 nm and the light scattering data at 658 nm were collected along the elution volume, which were analyzed to give the molecular weight (MW) of the main peak. The predicted MW by the analysis is presented in the third column in the table with the percentage of the main peak in parenthesis. The theoretical MW calculated from the design sequence is shown in the second column.

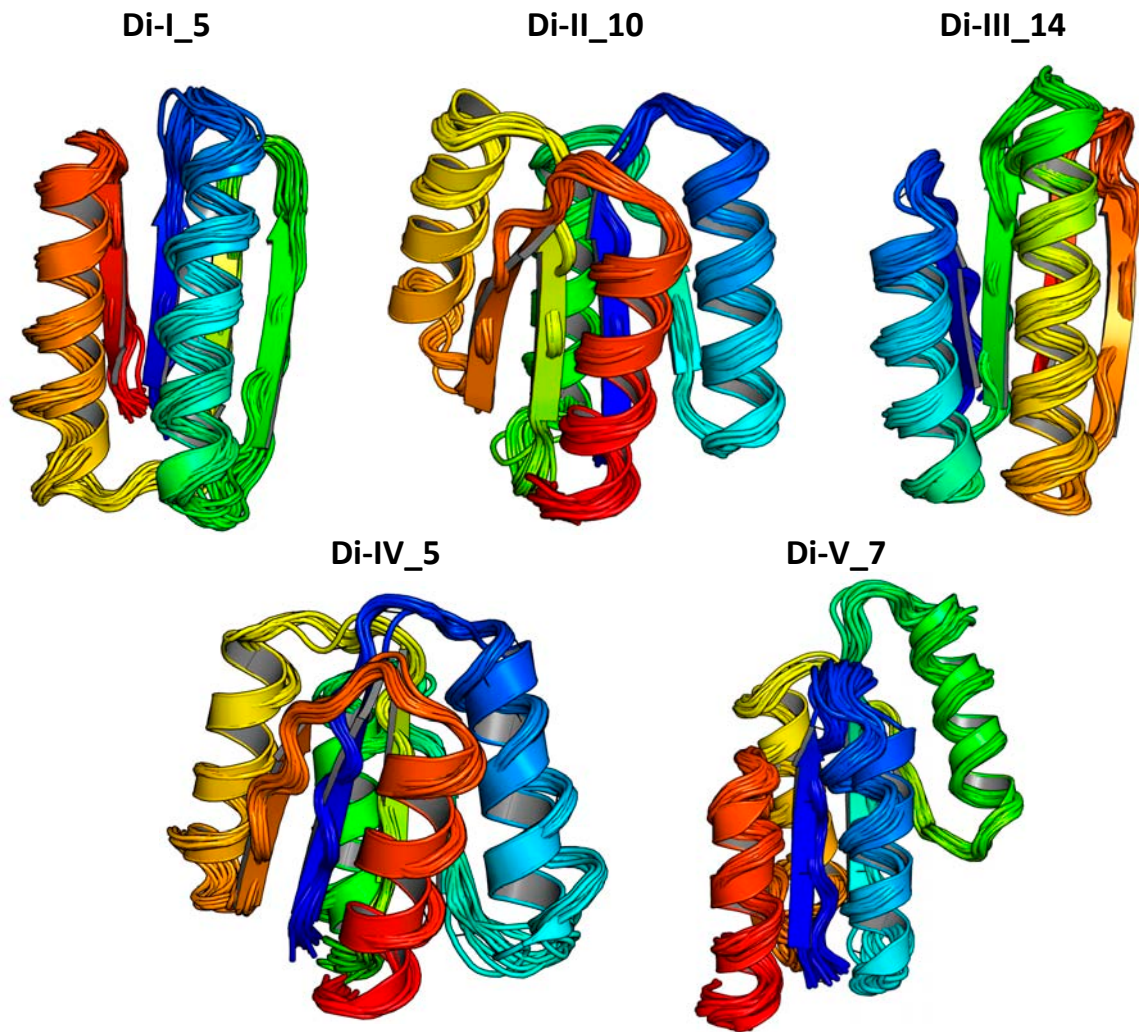

**Supplementary Figure 14 | Superpositions of computational models and NMR structures.**

Computational models are shown in cartoon and NMR structures, in wireframe.

|    | Expressed | Soluble | Alpha-beta protein CD spectrum | <i>T<sub>m</sub></i> (°C) | Monomeric | Well resolved 1D-NMR |
|----|-----------|---------|--------------------------------|---------------------------|-----------|----------------------|
| 1  | ✓         | ✓       | ✓                              | 48                        | *         | ✓                    |
| 2  | ✓         | ✓       |                                |                           |           |                      |
| 3  | ✓         | ✓       | ✓                              | 74                        | §         | ✓                    |
| 4  | ✓         | ✓       |                                |                           |           |                      |
| 5  | ✓         | ✓       | ✓                              | >> 95                     | ✓         | ✓                    |
| 6  |           |         |                                |                           |           |                      |
| 7  |           |         |                                |                           |           |                      |
| 8  | ✓         | ✓       | ✓                              | 56                        | ✓         |                      |
| 9  | ✓         | ✓       | ✓                              | > 95                      |           |                      |
| 10 | ✓         | ✓       | ✓                              | > 95                      |           |                      |
| 11 | ✓         |         |                                |                           |           |                      |

### Supplementary Table 1 | Summary of experimental results of 11 designs for Fold-I.

Each row corresponds to the results for each design. The columns give the results for each criterion, of which the details are described in Table 1. The design that satisfies a criterion is shown with a check mark and the design that does not satisfy a criterion is shown in white blank. The case that the experiment was not conducted is shown in gray blank.

\* The molecular weight of design #1 could not be obtained by SEC-MALS because the design has no TRP and TYR and the concentration could not be calculated from the absorbance at 280 nm.

§ The main peak of the absorbance at 280 nm was dimeric state.

|    | Expressed | Soluble | Alpha-beta protein CD spectrum | <i>T<sub>m</sub></i> (°C) | Monomeric | Well resolved 1D-NMR |
|----|-----------|---------|--------------------------------|---------------------------|-----------|----------------------|
| 1  | ✓         | ✓       | ✓                              | >> 95                     | *         |                      |
| 2  | ✓         | ✓       | ✓                              | >> 95                     |           |                      |
| 3  | ✓         | ✓       | ✓                              | >> 95                     | §         |                      |
| 4  | ✓         | ✓       | ✓                              | >> 95                     |           |                      |
| 5  | ✓         | ✓       | ✓                              | >> 95                     | ✓         | ✓                    |
| 6  | ✓         | ✓       | ✓                              | > 95                      |           |                      |
| 7  | ✓         | ✓       | ✓                              | > 95                      | ✓         | ✓                    |
| 8  | ✓         | ✓       |                                |                           |           |                      |
| 9  | ✓         | ✓       |                                |                           |           |                      |
| 10 | ✓         | ✓       | ✓                              | >> 95                     | ✓         | ✓                    |
| 11 | ✓         | ✓       | ✓                              | > 95                      | *         |                      |
| 12 | ✓         | ✓       | ✓                              | >> 95                     | ✓         | ✓                    |

**Supplementary Table 2 | Summary of experimental results of 12 designs for Fold-II.**

The summary was given in the same way as the Supplementary Table 1.

\* The main peak of the absorbance at 280 nm was dimeric or trimeric state.

§ The main peak of the absorbance at 280 nm was dimeric state.

|    | Expressed | Soluble | Alpha-beta protein CD spectrum | <i>T<sub>m</sub></i> (°C) | Monomeric | Well resolved HSQC |
|----|-----------|---------|--------------------------------|---------------------------|-----------|--------------------|
| 1  | ✓         | ✓       | *                              | > 95                      | ✓         | ✓                  |
| 2  | ✓         | ✓       | ✓                              | ≈ 95                      |           |                    |
| 3  |           |         |                                |                           |           |                    |
| 4  | ✓         | ✓       | ✓                              | 88                        | §         |                    |
| 5  | ✓         | ✓       | ✓                              | ≈ 95                      |           |                    |
| 6  | ✓         |         |                                |                           |           |                    |
| 7  | ✓         |         |                                |                           |           |                    |
| 8  | ✓         | ✓       | ✓                              | 60                        |           |                    |
| 9  | ✓         | ✓       | ✓                              | ≈ 95                      |           |                    |
| 10 | ✓         | ✓       | ✓                              | > 95                      | ✓         | ✓                  |
| 11 | ✓         | ✓       | ✓                              | ≈ 95                      | ✓         | ✓                  |
| 12 | ✓         | ✓       | ✓                              | 73                        | ✓         | ✓                  |
| 13 | ✓         | ✓       |                                |                           | ✓         |                    |
| 14 | ✓         | ✓       | ✓                              | >> 95                     | ✓         | ✓                  |

**Supplementary Table 3 | Summary of experimental results of 14 designs for Fold-III.**

The summary was given in the same way as the Supplementary Table 1.

\* The CD spectrum was not characteristic of alpha-beta proteins, but indicated that this protein forms some secondary structures.

§ The main peak of the absorbance at 280 nm was dimeric state.

|   | Expressed | Soluble | Alpha-beta protein CD spectrum | <i>T<sub>m</sub></i> (°C) | Monomeric | Well resolved HSQC |
|---|-----------|---------|--------------------------------|---------------------------|-----------|--------------------|
| 1 | ✓         | ✓       | ✓                              | ≈ 95                      | ✓         | ✓                  |
| 2 | ✓         | ✓       | ✓                              | 60                        | ✓         |                    |
| 3 | ✓         | ✓       | ✓                              | 78                        | ✓         | ✓                  |
| 4 |           |         |                                |                           |           |                    |
| 5 | ✓         | ✓       | ✓                              | ≈ 95                      | ✓         | ✓                  |

**Supplementary Table 4 | Summary of experimental results of 5 designs for Fold-IV.**

The summary was given in the same way as the Supplementary Table 1.



|    | Expressed | Soluble | Alpha-beta protein CD spectrum | <i>T<sub>m</sub></i> (°C) | Monomeric | Well resolved HSQC |
|----|-----------|---------|--------------------------------|---------------------------|-----------|--------------------|
| 1  | ✓         | ✓       |                                |                           | *         |                    |
| 2  | ✓         | ✓       |                                |                           | *         |                    |
| 3  | ✓         | ✓       | ✓                              | ≈ 95                      |           |                    |
| 4  | ✓         | ✓       |                                |                           |           |                    |
| 5  |           |         |                                |                           |           |                    |
| 6  | ✓         | ✓       | ✓                              | ≈ 95                      |           |                    |
| 7  | ✓         | ✓       | ✓                              | > 95                      | ✓         | ✓                  |
| 8  | ✓         |         |                                |                           |           |                    |
| 9  | ✓         | ✓       |                                |                           | *         |                    |
| 10 | ✓         | ✓       |                                |                           | *         |                    |
| 11 | ✓         | ✓       |                                |                           | *         |                    |
| 12 | ✓         | ✓       |                                |                           | *         |                    |

**Supplementary Table 5 | Summary of experimental results of 12 designs for Fold-V.**

The summary was given in the same way as the Supplementary Table 1.

\* The main peak of the absorbance at 280 nm was dimeric state.

|                  | RMSD between design and NMR (Å) |             | $\Delta G$ (kcal/mol) | $m$ -value<br>(kcal/(mol•M)) | $T_m$ (°C)   |
|------------------|---------------------------------|-------------|-----------------------|------------------------------|--------------|
|                  | C $\alpha$ atoms                | Heavy atoms |                       |                              |              |
| <b>Di-I_5</b>    | 1.2                             | 2.2         | 9.1                   | 2.0                          | >> 95        |
| <b>Di-II_10</b>  | 1.1                             | 1.9         | 14.9                  | 3.2                          | >> 95        |
| <b>Di-III_14</b> | 1.1                             | 2.1         | 5.6                   | 2.0                          | >> 95        |
| <b>Di-IV_5</b>   | 1.7                             | 2.3         | 4.8                   | 3.3                          | $\approx$ 95 |
| <b>Di-V_7</b>    | 2.0                             | 2.8         | 7.3                   | 2.9                          | > 95         |

### Supplementary Table 6 | Experimental data of design for each of the five folds.

The second and third columns show the averaged RMSD between the design model and the 20 NMR structures using C $\alpha$  atoms and heavy atoms respectively. The computationally designed region corresponds to the region from N=2 Glu to N=77 Arg in the NMR structures (PDB code: 2kl8) for Di-I\_5, N=2 Leu to N=100 Gly in 2lv8 for Di-II\_10, N=3 Leu to N=74 Gly in 2ln3 for Di-III\_14, N=2 Gly to N=102 Ala in 2lvb for Di-IV\_5, and N=3 Ser to N=101 Gly in 2lta for Di-V\_7. These regions were used for RMSD calculations. The subsequent columns show the free energy of unfolding  $\Delta G$ , its dependency on the denaturant,  $m$ -value, and the melting temperature  $T_m$ .

|                                                                                     | Di-I_5      | Di-II_10   | Di-III_14  | Di-IV_5     | Di-V_7      |
|-------------------------------------------------------------------------------------|-------------|------------|------------|-------------|-------------|
| <b>NMR distance and dihedral restraints</b>                                         |             |            |            |             |             |
| Distance restraints                                                                 |             |            |            |             |             |
| Total NOE                                                                           | 1359        | 4081       | 2711       | 2835        | 2961        |
| Intra-residue                                                                       | 371         | 782        | 576        | 515         | 754         |
| Inter-residue                                                                       |             |            |            |             |             |
| Sequential ( $ i-j  = 1$ )                                                          | 354         | 914        | 613        | 663         | 699         |
| Medium-range ( $ i-j  \leq 4$ )                                                     | 227         | 959        | 577        | 642         | 577         |
| Long-range ( $ i-j  \geq 5$ )                                                       | 407         | 1426       | 945        | 1015        | 931         |
| Intermolecular                                                                      |             |            |            |             |             |
| Hydrogen bonds                                                                      | 64          | 88         | 70         | 82          | 38          |
| Total dihedral angle restraints                                                     |             |            |            |             |             |
| phi                                                                                 | 64          | 78         | 54         | 80          | 82          |
| psi                                                                                 | 64          | 78         | 54         | 80          | 82          |
| Total RDCs                                                                          |             |            |            |             |             |
| Q(%, alignment media 1 <sup>§</sup> )                                               |             | 17.2       | 11.2       |             | 22.9        |
| Q(%, alignment media 2 <sup>§</sup> )                                               |             | 13.9       | 9.5        |             | 16.4        |
| <b>Structure statistics</b>                                                         |             |            |            |             |             |
| Violations                                                                          |             |            |            |             |             |
| Distance restraints <sup>¶</sup> (Å)                                                |             |            |            |             |             |
| mean                                                                                | 0.000       | 0.001      | 0.001      | 0.001       | 0.001       |
| rmsd                                                                                | 0.004       | 0.008      | 0.009      | 0.010       | 0.011       |
| sd                                                                                  | 0.004       | 0.008      | 0.009      | 0.010       | 0.011       |
| Dihedral angle restraints (°)                                                       |             |            |            |             |             |
| mean                                                                                | 0.078       | 0.130      | 0.148      | 0.099       | 0.122       |
| rmsd                                                                                | 0.310       | 0.618      | 0.632      | 0.490       | 0.625       |
| sd                                                                                  | 0.300       | 0.604      | 0.614      | 0.480       | 0.613       |
| Max. distance restraint violation (Å)                                               | 0.17        | 0.46       | 0.51       | 0.47        | 0.46        |
| Max. dihedral angle restraint violation (°)                                         | 3.1         | 7.1        | 5.7        | 5.7         | 9.2         |
| Deviations from idealized geometry                                                  |             |            |            |             |             |
| Bond lengths (Å)                                                                    | 0.010       | 0.019      | 0.018      | 0.018       | 0.019       |
| Bond angles (°)                                                                     | 0.5         | 1.2        | 1.2        | 1.1         | 1.2         |
| Improper (°)                                                                        | 1.2         | 1.7        | 1.8        | 1.7         | 2.0         |
| Average pairwise r.m.s.d.** (Å)                                                     |             |            |            |             |             |
| Heavy                                                                               | 1.79±0.16   | 1.28±0.09  | 1.18±0.14  | 1.23±0.10   | 1.62±0.12   |
| Backbone                                                                            | 0.93±0.13   | 0.60±0.08  | 0.59±0.12  | 0.67±0.08   | 0.87±0.12   |
| RPF Scores                                                                          |             |            |            |             |             |
| Recall                                                                              | 0.96        | 0.96       | 0.97       | 0.97        | 0.98        |
| Precision                                                                           | 0.90        | 0.98       | 0.97       | 0.96        | 0.97        |
| F-measure                                                                           | 0.93        | 0.97       | 0.97       | 0.96        | 0.97        |
| DP-scores                                                                           | 0.69        | 0.89       | 0.90       | 0.87        | 0.87        |
| Structure Quality Factors - overall statistics scores (raw/Z-scores <sup>¶¶</sup> ) |             |            |            |             |             |
| Procheck G-factor (phi / psi only)**                                                | 0.00/0.31   | 0.19/1.06  | 0.00/0.31  | 0.05/0.51   | 0.01/0.35   |
| Procheck G-factor (all dihedral angles)**                                           | 0.00/-0.00  | 0.15/0.89  | 0.07/0.41  | 0.02/0.12   | -0.14/-0.83 |
| Verify3D                                                                            | 0.47/0.16   | 0.55/1.44  | 0.40/-0.96 | 0.46/0.00   | 0.52/0.96   |
| ProsaII (-ve)                                                                       | 0.95/1.24   | 1.43/3.23  | 0.86/0.87  | 1.07/1.74   | 1.18/2.19   |
| MolProbity clashscore                                                               | 15.31/-1.16 | 17.7/-1.51 | 13.6/-0.81 | 16.45/-1.30 | 21.0/-2.08  |
| Ramachandran Plot Summary from Richardson Lab's Molprobity**                        |             |            |            |             |             |
| Most favored regions (%)                                                            | 97.2        | 98.8       | 99.5       | 98.2        | 98.2        |
| Allowed regions (%)                                                                 | 2.7         | 1.2        | 0.5        | 1.8         | 1.8         |
| Disallowed regions (%)                                                              | 0.1         | 0.0        | 0.0        | 0.0         | 0.0         |

### **Supplementary Table 7 | NMR and refinement statistics for protein structures\*.**

\* Analyzed for the 20 lowest energy refined structures of design for each of the five folds, which are deposited in PDB: Di-I\_5 (PDB code: 2kl8), Di-II\_10 (2lv8), Di-III\_14 (2ln3), Di-IV\_5 (2lvb), Di-V\_7 (2lta), by using PDBSTAT and PSVS 1.4<sup>S7,8</sup>.

§ PEG and phage were used as alignment media 1 and 2.

¶ Calculated by using sum over  $r^{-6}$ .

\*\* Calculated among 20 refined structures for well-defined residues that have sum of phi and psi order parameters<sup>S9</sup>  $S(\phi)+S(\psi)>1.8$ <sup>S7</sup>. The well-defined residues of Di-I\_5: 2-9, 12-28, 32-47, 49-79; Di-II\_10: 1-48, 51-99; Di-III\_14: 5-64, 67-73; Di-IV\_5: 3-26, 29-49, 52-102; Di-V\_7: 3-10, 13-99.

⌘ With respect to mean and standard deviation for a set of 252 X-ray structures with sequence lengths < 500, resolution  $\leq 1.80$  Å, R-factor  $\leq 0.25$  and R-free  $\leq 0.28$ ; a positive value indicates a 'better' score.

## Supplementary Method 1 | Simulations for two secondary structure elements.

In the simulations of  $\beta\beta$ -units, the following secondary structure assignments were given as input:  $S_1[6]$ - $L[2-5]$ - $S_2[6]$  (L is loop, S is strand, and the numbers within the brackets are their lengths.  $L[2-5]$  means that the loop length ranges from 2 to 5). Multiple independent Monte Carlo trajectories were carried out, and then for the end point of each trajectory, we calculated the secondary structure using DSSP<sup>S10</sup>. The distribution of chirality in the end point structures, in which  $S_1$  and  $S_2$  made an antiparallel strand pairing, and the residue positions of the loop and the loop length exactly agreed with the input assignment, was then calculated (left in Fig. 1a).

$\beta\alpha$ - and  $\alpha\beta$ -units were studied in parts of  $\beta\alpha\beta$ -units in which the strands made a parallel strand pair with one another. Inputs of secondary structure assignments of the  $\beta\alpha\beta$ -units were  $S_1[6]$ - $L_1[2-3]$ - $H[14]$ - $L_2[4]$ - $S_2[6]$  for  $\beta\alpha$ -units and  $S_1[6]$ - $L_1[4]$ - $H[14]$ - $L_2[2-4]$ - $S_2[6]$  for  $\alpha\beta$ -units. As for the  $\beta\beta$ -units, multiple independent Monte Carlo trajectories were carried out for both cases, and the secondary structures of the end point structures were assigned by DSSP. We selected end point structures in which  $S_1$  and  $S_2$  made a parallel strand pairing and the residue positions of  $L_1$  ( $L_2$ ) and the  $L_1$  ( $L_2$ ) length were in agreement with the input assignment for  $\beta\alpha$ -units ( $\alpha\beta$ -units). Finally, we computed the orientation of  $\beta\alpha$ -units using the segments of  $S_1$ ,  $L_1$ , and  $H$  of the  $\beta\alpha\beta$ -units (left in Fig. 1b), and computed the orientation of  $\alpha\beta$ -units using  $H$ ,  $L_2$ , and  $S_2$  of the  $\beta\alpha\beta$ -units (Supplementary Fig. 4). For the  $\alpha\beta$ -units, we further selected structures in which the loop provided the helix capping and did not extend the strand. These features were defined using the loop torsion angles described by the ABEGO letters<sup>S11</sup>; each letter represents a torsion space of phi, psi, and omega: A represents  $-180^\circ \leq \phi < 0^\circ$  and  $-75^\circ \leq \psi < 50^\circ$ ; B is  $-180^\circ \leq \phi < 0^\circ$  and  $(50^\circ \leq \psi < 180^\circ$  or  $-180^\circ \leq \psi < -75^\circ)$ ; E is  $0^\circ \leq \phi < 180^\circ$  and  $(100^\circ \leq \psi < 180^\circ$  or  $-180^\circ \leq \psi < -100^\circ)$ ; G is  $0^\circ \leq \phi < 180^\circ$  and  $-100^\circ \leq \psi < 100^\circ$ ; A, B, E, and G have  $\omega \sim 180^\circ$ ; O has  $\omega \sim -180^\circ$ . We selected structures in which the loop provided the helix capping: GZ for 2-residue loop, GZX and ZGZ for 3-residue loop, and GZXX, ZGZX, AZGZ and BZAZ for 4-residue loop (Z = A, B; X can be any letter of the five letters)<sup>S12</sup>. We further eliminated structures in which the loop extended the strand: XBB for 3-

residue loop, and XXBB for 4-residue loop. Finally, we calculated the orientation of  $\alpha\beta$ -units using these filtered structures (left in Fig. 1c).

## Supplementary Method 2 | Simulations for three secondary structure elements.

To study  $\beta\beta\alpha$ -units, we considered  $\beta\beta\alpha\beta$  secondary structure string:  $S_1[4-7]-L_1[2,5]-S_2[4-7]-L_2[2,3]-H[14]-L_3[4]-S_3[6]$  ( $S_1$  and  $S_2$  have the same length). To study  $\alpha\beta\beta$ -units, we considered  $\beta\alpha\beta\beta$  secondary structure string:  $S_1[6]-L_1[4]-H[14]-L_2[2]-S_2[4-7]-L_3[2,5]-S_3[4-7]$  ( $S_2$  and  $S_3$  have the same length).

Multiple independent Monte Carlo trajectories were carried out for both cases, and secondary structures of the end point structures were assigned by DSSP. For  $\beta\beta\alpha\beta$  units, we selected end point structures in which 1)  $S_1$  and  $S_2$  made an antiparallel pairing, 2)  $S_3$  made an antiparallel pairing with  $S_1$  for L topology or a parallel pairing with  $S_2$  for R topology, and 3) the residue positions and lengths of  $L_1$  and  $L_2$  were in agreement with the input assignment. For  $\beta\alpha\beta\beta$  units, we selected structures in which 1)  $S_2$  and  $S_3$  made an antiparallel pairing, 2)  $S_1$  made an antiparallel pairing with  $S_3$  for L topology or a parallel pairing with  $S_2$  for R topology, and 3) the residue positions and lengths of  $L_2$  and  $L_3$  were in agreement with the input assignment. Finally, we calculated the chirality of  $\beta\beta\alpha$ -units using  $S_1$ ,  $S_2$ , and  $H$ , and the chirality of  $\alpha\beta\beta$ -units using  $H$ ,  $S_2$ , and  $S_3$ .

$\beta\alpha\beta$ -units were studied with input secondary structure assignments of  $S_1[4-7]-L_1[2,3]-H[10, 14, 18]-L_2[2]-S_2[4-7]$  ( $S_1$  and  $S_2$  have the same length). We performed 8000 independent trajectories, and assigned the secondary structures of the end point structures by DSSP. We selected structures in which  $S_1$  and  $S_2$  made a parallel strand pairing, and all the secondary structure elements,  $S_1$ ,  $L_1$ ,  $H$ ,  $L_2$ , and  $S_2$ , were in agreement with the input assignment.

### Supplementary Method 3 | Analysis of natural protein features.

The PISCES server<sup>S13</sup> was used to collect 6875 X-ray structures in the PDB with resolution  $\leq 2.5\text{\AA}$ , R-factor  $\leq 0.3$ , sequence lengths from 40 to 10000, and  $\leq 25\%$  sequence identity, and their secondary structures were assigned using DSSP.  $\beta\beta$ -,  $\beta\alpha$ -,  $\alpha\beta$ -,  $\beta\beta\alpha$ -, and  $\alpha\beta\beta$ - units were identified as adjacent secondary structure elements (no intervening secondary structure element other than a loop) in which the strands were at least 2 residues and the helices were at least 5 residues in length. For  $\beta\alpha$ -,  $\alpha\beta$ -,  $\beta\beta\alpha$ -, and  $\alpha\beta\beta$ - units, the angle between a vector along the helix and a vector along the strand must be  $\leq 60^\circ$ . For  $\beta\alpha$ - and  $\beta\beta\alpha$ - units, we define the vector from the N (backbone amide nitrogen) atom of the first helix residue to the C (backbone carbonyl carbon) atom of the fourth helix residue as the helix vector, and the vector from the N to C atoms of the last residue in the strand immediately preceding the helix as the strand vector. For  $\alpha\beta$ - and  $\alpha\beta\beta$ - units, we define the vector from the N atom of the fourth helix residue from the last to the C atom of the last helix residue as the helix vector, and the vector from the N to C atoms of the first residue in the strand immediately following the helix as the strand vector. The  $\beta\beta\alpha$ - and  $\alpha\beta\beta$ - units for which the strands include bulges were omitted.



#### **Supplementary Method 4 | Definition of the chirality of a $\beta\beta$ -unit in fundamental rules.**

In the Methods Summary, the chirality of a  $\beta\beta$ -unit was considered using the vector  $\vec{u}$  along the axis of the first strand, and the vector  $\vec{v}$  perpendicular to  $\vec{u}$  between the centers of the two strands. Since twisted strands lead to inaccurate assignments of the chirality, however, we used atom coordinates close to the loop between the strands for the definition of  $\vec{u}$  and  $\vec{v}$ :  $\vec{u}$  is a vector from the N (backbone amide nitrogen) to C (backbone carbonyl carbon) atoms of the strand residue preceding the connecting loop and  $\vec{v}$  is a vector from the  $C\alpha$  atom of the strand residue preceding the loop to the  $C\alpha$  atom of the strand residue following the loop.

#### **Supplementary Method 5 | Definition of the orientation of $\beta\alpha$ - and $\alpha\beta$ - units in fundamental rules.**

In the Methods Summary, the orientation of  $\beta\alpha$ - and  $\alpha\beta$ - units was defined using the vector between the centers of the strand and helix. Since twisted strands and kinked helices lead to the inaccurate assignments of the orientation, however, we used a vector close to the loop for the definition of the vector. For a  $\beta\alpha$ -unit, we used a vector from the  $C\alpha$  atom of the last residue in the strand to the average coordinate of the first 11 backbone atoms (N, C, and  $C\alpha$ ) in the helix. For a  $\alpha\beta$ -unit, we used a vector from the average coordinate of the last 11 backbone atoms (N, C and  $C\alpha$ ) in the helix to the  $C\alpha$  atom of the first strand residue. We defined the orientation of  $\beta\alpha$ - and  $\alpha\beta$ - units as parallel (P) when the angle between the vector and the  $\overrightarrow{C\alpha C\beta}$  vector of the strand residue closest to the helix is  $\leq 80^\circ$ , and antiparallel (A) when the angle is  $\geq 100^\circ$ .

## Supplementary Table 8 | Designed sequences

Computationally designed sequences are shown in uppercase and residues added to allow expression, purification, and the spacer between the designed sequence and the N-terminal Met or the C-terminal His-tag are shown in lowercase.

---

|         |                                                                                                 |
|---------|-------------------------------------------------------------------------------------------------|
| Di-I_1  | mEMDVRFRMNDLDGLIKAADEMKREAERANGTITKTLDGNDLEIRITNVTEQERKEIAQRAEELAKEFNQTVTKTIRgsl<br>ehhhhhh     |
| Di-I_2  | mTLDIRLKMNDKDGGLIDAAQRLEEEARKHKGTITKTIDGNEMEFMTNMTEQFRKELMEEAEKLAKRYQGTITKTIRgsl<br>ehhhhhh     |
| Di-I_3  | mEMDIRFRGDDLEAFQKAAERAEEAKKYAGTVTKTLDGNDLEIRITGVTEEVKELIQRAEELAKEFNITVTKTIRgsl<br>hhhh          |
| Di-I_4  | mELDIRFRGNDDEALKRAEEEMEEDAKKAAGTITKTVDGNDVEIRITNITQQWAERIRKEAERRAREEGTTATKTWRgsl<br>ehhhhhh     |
| Di-I_5  | mEMDIRFRGDDLEAFQKALKEKEMIRQARKFAGTVTYTLDGNDLEIRITGVPEQVRKELAKEAERLAKEFNITVTYTIR(gs)le<br>hhhhhh |
| Di-I_6  | mKLNVRIRDSDQNKLQKALKKFIELARKSNGTITKTYTGTDLEIQITNITQEEIQIAEEAQKLAQKINGTVTKTFTgsle<br>hhh         |
| Di-I_7  | mTMEFRFRGDNQEGFDKAKDLAKKWAQKFNQTVTKTLTGNDLDIRITNVPEEARKKFKQWAEELAKKFNITVTKTITg<br>sl<br>ehhhhhh |
| Di-I_8  | mTLDIKFHGDSPEAWEKAREMAEELAREFNQTVTKTITGDDVEIRITNIPEEAKQRGRERAEELAKEANITVTKTITgsl<br>hhhhh       |
| Di-I_9  | mEAEVFRFRMDDYDGLVKAIQRMIEEAKRANGTITKTITGDDVDIRITNITEREAKEIFREAQRLAQEFNGTVTKTYTgsl<br>hhhhh      |
| Di-I_10 | mEMDIRFDGDDLEAFQEFQRAKERAKEYAGTMTKTLDGNDLEIRITGVPEQARKEFAEELAREKNITVTKTIRgsl<br>hhhhhh          |
| Di-I_11 | mELDIRLKMNDDEGLKKARERMEEEARKHNGTFTKTLRGNDLELRMKNMTEKFRKELVEEAEKLAKRFNGTITKTFRgsl<br>ehhhhhh     |

---

**11 designs for Fold-I.** The C-terminal gs spacer of Di-I\_5 (shown in parenthesis) was removed in the NMR structure determination.

---

|          |                                                                                                                     |
|----------|---------------------------------------------------------------------------------------------------------------------|
| Di-II_1  | mNYFILVFTNNEDIIEVERMAQDSGLQYRTVSKDEAKKYLEEFRRRSQNIYVLLVVSDEKYLRELEELARKFDIQVTS<br>VKAESPDKARDDVKEYSEKgslehhhhhh     |
| Di-II_2  | mNYFILVFTNNKRIIEVEEIIAKKKGFQVRQVKDKDEARKYLEEFKKKSKNIYVIIIIVGTEKYLRELKRFADFEDIQVRTRK<br>VTSPDQARDDVEELSERFgslehhhhhh |
| Di-II_3  | mNIFVLVFTSDEELIKYVEEMAKKDNVTVKHVKTKNEAKKYLDEFKKKSQNIYVILLVRDEKSWREFEELARKLNIQVRT<br>SKIESPDKAKDSLRFYEEFgslehhhhhh   |
| Di-II_4  | mNIFVLVFTTDKRLIEKIREIVEKQNTQVRTVESEDHAKDYLEEFRRRSKNIFVLLMVHTEEYLRRKELAEKFEIDVTSM<br>RVTSPDEAKDSVKDLIDKgslehhhhhh    |
| Di-II_5  | mNIFVLVFTDDEKAYREIEKEVRRRGAEIRRVKDSSEARRYLEEFLRKDKNVVVIILVKNEEELEKFRELADKFNIQVRSR<br>RVHSPPEAKRWFKELEKRFgslehhhhhh  |
| Di-II_6  | mIFVLVFWGTDEDAREEEAEKVARKQNVKYRTVTTKDTMKDLFEKFKKESENIYVVIIVSTEEDLKKAKELAEEMDIQVR<br>TRSARSPPEARKWAKKLEEGgslehhhhhh  |
| Di-II_7  | mLIYVIFGGSDDELDRKVKELAKRGAQVRTVHSKDELKLLLEEFKKQGDNVFVLILVNDEKMRKLAEEELAKKYNLQIRT<br>RRVQSPDIADRKEYIEKVgslehhhhhh    |
| Di-II_8  | mLSYIFVFTDDRKLYEEAEKMARKQGFQLTRVETEDHFEKKLRELKRSKNIYVLIIVKDRESLDKFKERAEEESDVQVKS<br>VEAQSPDEAKDWVKEYSEEIgslehhhhhh  |
| Di-II_9  | mIYVLIITTNKKLIEEAEKMAKKANLELRTVKDDDEFKKYLDEFKDKDENIYVLVIVSTQEKLQKARKRAKEEIDIRTRD<br>AQSPDKAKDYIEKYFRKIgslehhhhhh    |
| Di-II_10 | mLLYVLIISNDKKLIEEARKMAEKANLELRTVKTEDELKKYLEEFRKESQNIYVLIIVSNDDELDKAKELAQKMEIDVRTR<br>KVTSPDEAKRWIKFSEEGgslehhhhhh   |
| Di-II_11 | mLEYVILGGSKKLIEEVKLAENKGMIEIRTVTSKDELKDLLKEFKEKSQNLFVVIIVRDEELLKAEELAKKYNLQIRTYRA<br>QSPDKAKDYVKEYYERIGslehhhhhh    |
| Di-II_12 | mILYVLIFTNDEKLIRKAKEMAEMGIELRTVKDTNELKRYLEEFKRKDDNIQVIIIIVTNDLKKATKLAREYNIDVRTR<br>RATSPDEAKDLIKKYFEKgslehhhhhh     |

---

**12 designs for Fold-II.**

---

|           |                                                                                       |
|-----------|---------------------------------------------------------------------------------------|
| Di-III_1  | MQLKFTSNDENKMLQWMKDAIKQGKKLEFRFTSTDDDRIKKFLQLAEDLAKESGVQIKIKTKGDTYEVELEGslehhhh<br>hh |
| Di-III_2  | MQYKFTSSDTERMKQEMKDAIKNGKSLRFEFRSTDDDQLKKFLEEAELAKKSGVQIEIRWKGNTFEVQLTGslehhhh<br>hh  |
| Di-III_3  | MKIKFKSDDENKIEKWLEEALKKGIEIEFRIRLNNDRLDSIKDQFKKKVVEEQGVQYEIRWEGNELRLEMKGslehhhhhh     |
| Di-III_4  | MQLRFKSNQILKWMKEAIKKGIELEFEIESNDQNQLDEIKDEFEREVREQGVKYQIEEKGNKLELKVKGslehhhhh<br>h    |
| Di-III_5  | MRYRFRSEDKNQILKWMEEAIKKGEMDFEIDSNNDDQLDEIRDKFKDEVQKKGVEYKIETQGNTLRRLIVKGslehhhh<br>hh |
| Di-III_6  | mKKLKFSSDDDNQIIKWMREAIIKKGKMKFEIEQTDDNRLEEIKRKFDEVQKQGVYKIEEKGNKLELEVKGslehhhh<br>hh  |
| Di-III_7  | MQLRYRTQNEQIKDLVKKAAQKGIQMEMQMQDNDKKQLEEMLKKVSEIAQKEGVQYQYSWQGDSLVSQGSle<br>ehhhhhh   |
| Di-III_8  | MRLKYQSDDDNKMLQLMKDAIKNGKELEFKFTDNTDDQIKDFLKAEDLARKSGVQIKLKTEGNDYEVNLRGlehhh<br>hhh   |
| Di-III_9  | mDQYKFTSKDKDELDDWMKKMIQQGKRLEMEFRDNTDDNKLQFWEDIEREAKQGVQIEYEQQGNTIEIRIQGsl<br>hhhhh   |
| Di-III_10 | mDRLKITSNDKDELLERVKEAIEQGIEIEIIDDNTDDKIKEILDEFELVKKSGVQIEIRWQGNRLELEIRGlehhhhhh       |
| Di-III_11 | mSRIRIQTRDDEELRELVKRAAEQGIKVIQIQDNDEKLRREIEEDAEKIARERGVQIKSRWQGSLEIEIEGlehhhhhh       |
| Di-III_12 | MQLKFKSDDKDKMLQWMKDAIKQKGELEIEIDTNDNRLDEMKDLAEDLARKQGVQIEIREQGNTIEVRLKGsleh<br>hhh    |
| Di-III_13 | mgLTRTIEDQDTKDLEWLKKAIDDGKRLKIRFQDNTDNLKEFEQRIEDLAKEKGVQIKKRTQGDKLEFELEGsleh<br>hh    |
| Di-III_14 | mgLTRTITSQNKEELLEIALKFISQGLDLEVEFDSTDDKEIEEFERDMEDLAKKTGVQIQKQWQGNKLRIRLKGsle<br>hh   |

---

**14 designs for Fold-III.**

---

|         |                                                                                                                      |
|---------|----------------------------------------------------------------------------------------------------------------------|
| Di-IV_1 | mGRVLLIVSTNKNDINQLKDLVRKSGPGKEVRTVSNSNQIRNVIQTAKSNGRPLIVFINGATDDDDIKEFERDMQQEGLQ<br>YRVVSTDPEELRTEVKKFDNSDgslehshhhh |
| Di-IV_2 | mGKVLLIVSNDSNDITEVEREARKQGPGKETRTVTNKDDIETVINHMKNNGKPLIVFSSGATDQDIKYFEKVAQQSGVS<br>YEVKSDPEELRTEVRNFVQSLgslehshhhh   |
| Di-IV_3 | mGKVLLIVTSNQNLNLIQIKKEIESQGPQKYTRTVTNSDDIRDIKSARKSGGPMVVFNSGATDNDIKKFQSIASNEGIEYR<br>VRTDTPPEELLSEARRFVKQAgshshshhhh |
| Di-IV_4 | mGKVLLIITDSNILQKLRQRMKSSPGKQSRTVTTDSDIRQAISNARQNGRPMVIFIRGGNSDRIDDFESIAKKEGITYD<br>VVRNTDPEELRERVEEFVKNEgshshshhhh   |
| Di-IV_5 | mGKVLLIVSTDTNIISSVQERAKHNYPGREIRTATSSQDIRDIKSMKDNGKPLVVFVNGASQNDVNEFQNEAKKEGVSY<br>DVLKSTDPEELTQRVREFLKTAgshshshhhh  |

---

**5 designs for Fold-IV.**

---

|         |                                                                                                                   |
|---------|-------------------------------------------------------------------------------------------------------------------|
| Di-V_1  | mgSAIIIIYSTDDNKLKWKVEVKDQGIEVYLLSDDDEDRLLKWLKLRSGIEVREVKDDDDLKQILDDIKKKRPQLEI<br>REVQSEDRMKKALESVKEKSGslehthhhh   |
| Di-V_2  | mgSIIVVISSDDQKLKDWVEKVRKRGIEVIMYKDKDQNRDLQVIKDMQNGVEVRKVEDDDDLKEILDRIKKRPQ<br>LEIREVQSEDRMKKALDEAEKRGslehthhhh    |
| Di-V_3  | mgSIILVIYSSDKQNLKAKKVRKQGIEVFILLSDTDEQKLKDWLQKLRNQGIEVREVRDKNLEQILKDIKKRPQLE<br>LRKVTSEDRLKEVLDEAKKRGslehthhhh    |
| Di-V_4  | mgSIIVVIYSSDKEELREKAEKARKQGIEVILLSDDDKDRLEKKLEDLRKQGIEVREVRDDDDLKQILDDIRKKRPQLR<br>DVQSEDRFKKVIKAEQERGSlehthhhh   |
| Di-V_5  | mgSAIIIISSDQQLKAKKVRREGVEVILLSKDKKLEEWLKLNRNQGIEVREVRDDDDMKQILKDFRKRERPL<br>QIRTVKSDRLKALDDVKKNGslehthhhh         |
| Di-V_6  | mgSVILVVISSDDEELRERAEKIRDQGIEVIVLLKDKDDDRLLKDKIDKIKSQGIEVRQINDDDDLKWLKEIKKKRPQLEI<br>RKITDEDEFKALEEAEKRGslehthhhh |
| Di-V_7  | mgSKIIVISSDDTTLEELARKIKDEGLEVYLLKDKDEKRLEEKIQKLKSGFEVRKVKDDDDIDKWIDKIKKERPLQEV<br>VTDEDQAKQILEDLKKKGSlehthhhh     |
| Di-V_8  | mgSAIIIVYSTDDEKLLKVKKAKDTGLEVFLLSNDNRLDQWLKDLRSQGIEVRKVNKNDLEKIKDIKKRPQLE<br>VRKVTDTNQFEQILKDLKKKGSlehthhhh       |
| Di-V_9  | mgSVIIVYSSDQENLEEIAQRIKDTGLEVILLSDDDEQKLKEWLQKLRNQGIEVREVKDQNDLDDILDDIEKKRPQLK<br>IRKVTDKQEAEDILRKAKEKGSlehthhhh  |
| Di-V_10 | mgSKIIIIYSSDDKTLLELVKIKKTGLEVYLLSNDNDEQRLEEWLKLNRNQGFEVRKVNKNDLEKIKKRRPQLEVR<br>KVTDKNEAEDILKLLKKEGSlehthhhh      |
| Di-V_11 | mgSKIIVYSSDKDKLKEIAEKIKETGLEVYILLSDTDEKLLKWLDEIKSQGIEVREIRDDDDLKEWLDRIKKRPQLEIR<br>EVTDKNQAEQILKLLKKEGSlehthhhh   |
| Di-V_12 | mgSAIIVYSTDDEKLLKLVKVKDKGLEVFLLSNDDEQKLKEWLQKLRSGIEVREIRDKNLEEWIKRIKKRPQLEV<br>RKVTDKDEAEQILKDLKKEGSlehthhhh      |

---

**12 designs for Fold-V.**

## References

- S1 Richardson, J. S. Handedness of crossover connections in beta sheets. *Proceedings of the National Academy of Sciences of the United States of America* **73**, 2619-2623 (1976).
- S2 Rohl, C. A., Strauss, C. E., Misura, K. M. & Baker, D. Protein structure prediction using Rosetta. *Methods Enzymol* **383**, 66-93, doi:10.1016/S0076-6879(04)83004-0 (2004).
- S3 Kuhlman, B. *et al.* Design of a novel globular protein fold with atomic-level accuracy. *Science* **302**, 1364-1368, doi:10.1126/science.1089427 (2003).
- S4 Tyka, M. D. *et al.* Alternate states of proteins revealed by detailed energy landscape mapping. *J Mol Biol* **405**, 607-618, doi:10.1016/j.jmb.2010.11.008 (2011).
- S5 Sheffler, W. & Baker, D. RosettaHoles: rapid assessment of protein core packing for structure prediction, refinement, design, and validation. *Protein Sci* **18**, 229-239, doi:10.1002/pro.8 (2009).
- S6 Cooper, S. *et al.* Predicting protein structures with a multiplayer online game. *Nature* **466**, 756-760, doi:10.1038/nature09304 (2010).
- S7 Bhattacharya, A., Tejero, R. & Montelione, G. T. Evaluating protein structures determined by structural genomics consortia. *Proteins* **66**, 778-795, doi:10.1002/prot.21165 (2007).
- S8 Huang, Y. J., Powers, R. & Montelione, G. T. Protein NMR recall, precision, and F-measure scores (RPF scores): Structure quality assessment measures based on information retrieval statistics. *Journal of the American Chemical Society* **127**, 1665-1674 (2005).
- S9 Hyberts, S. G., Goldberg, M. S., Havel, T. F. & Wagner, G. The solution structure of eglin c based on measurements of many NOEs and coupling constants and its comparison with X-ray structures. *Protein science : a publication of the Protein Society* **1**, 736-751, doi:10.1002/pro.5560010606 (1992).
- S10 Kabsch, W. & Sander, C. Dictionary of protein secondary structure: pattern recognition of hydrogen-bonded and geometrical features. *Biopolymers* **22**, 2577-2637, doi:10.1002/bip.360221211 (1983).
- S11 Kim, D. E., Blum, B., Bradley, P. & Baker, D. Sampling bottlenecks in de novo protein structure prediction. *J Mol Biol* **393**, 249-260, doi:10.1016/j.jmb.2009.07.063 (2009).
- S12 Aurora, R. & Rose, G. D. Helix capping. *Protein Sci* **7**, 21-38, doi:10.1002/pro.5560070103 (1998).
- S13 Wang, G. & Dunbrack, R. L., Jr. PISCES: a protein sequence culling server. *Bioinformatics* **19**, 1589-1591 (2003).
